# Supplementary material for: Synergistic effect of Ti3+ doping and facet regulation over Ti3+-doped TiO2 nanosheets with enhanced photoreactivity
Source: Royal Society of Chemistry journal article supplement (doi:10.1039/c8cy01016a), 2018-01-01
Supplement: c8cy01016a2.pdf [file c8cy01016a2.pdf]

## Supporting Information

# Synergistic Effect of $\text{Ti}^{3+}$ Doping and Facet Regulation over $\text{Ti}^{3+}$ Doped $\text{TiO}_2$ Nanosheets with Enhanced Photoreactivity

Xiaogang Liu<sup>a\*</sup> and Yingpu Bi<sup>b\*</sup>

<sup>a</sup> College of Chemistry and Chemical Engineering, Xinyang Normal University, Xinyang 464000, China. Email: lxg133298@163.com.

<sup>b</sup> State Key Laboratory for Oxo Synthesis & Selective Oxidation, National Engineering Research Center for Fine Petrochemical Intermediates, Lanzhou Institute of Chemical Physics, CAS, Lanzhou 730000, China. E-mail: yingpubi@licp.cas.cn.

## Additional figures

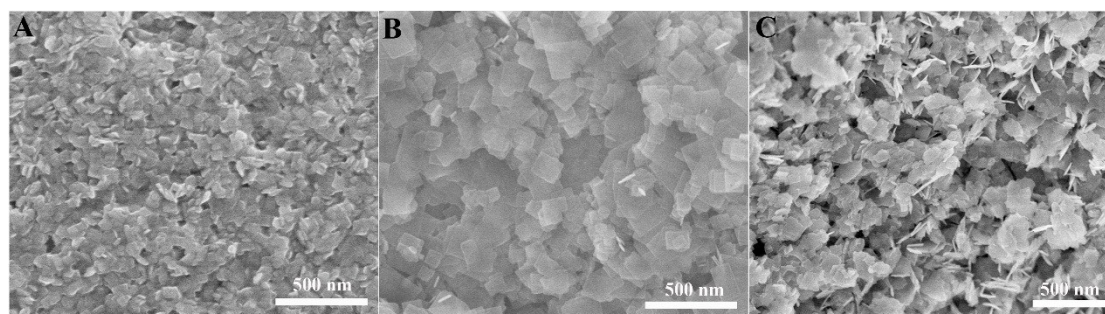

Fig.S1 SEM images of Air-TiO<sub>2</sub>-HF4.5 (A), Air-TiO<sub>2</sub>-HF6 (B) and Air-TiO<sub>2</sub>-HF9(C).

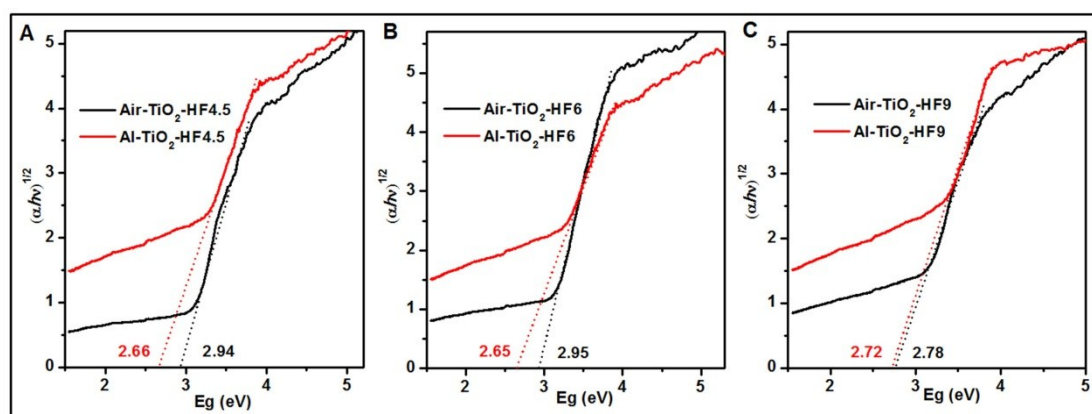

Fig. S2 Curves of the Kubelka–Munk function plotted against the photon energy for the samples before (black line) and after (red line) Al reduction with different volume of HF: A) 4.5 mL, B) 6 mL, and C) 9 mL.

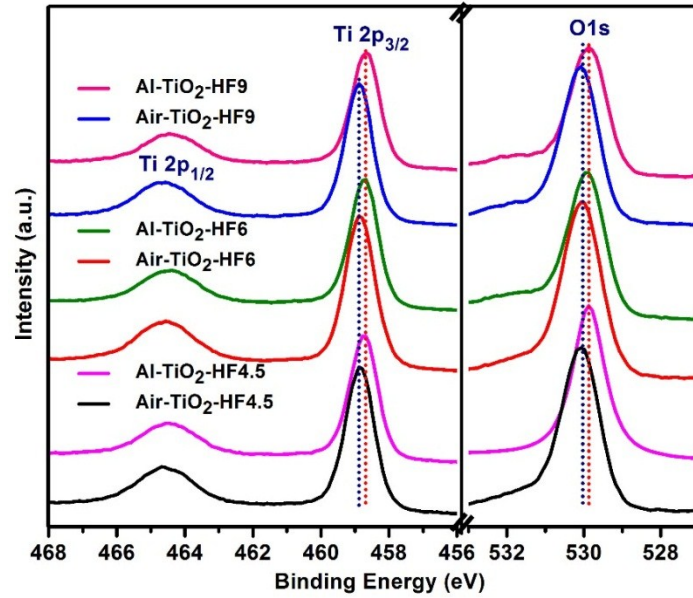

Fig. S3 High resolution XPS spectra of Ti 2p and O 1s XPS spectra of TiO<sub>2</sub> nanosheets treated before and after Al reduction.

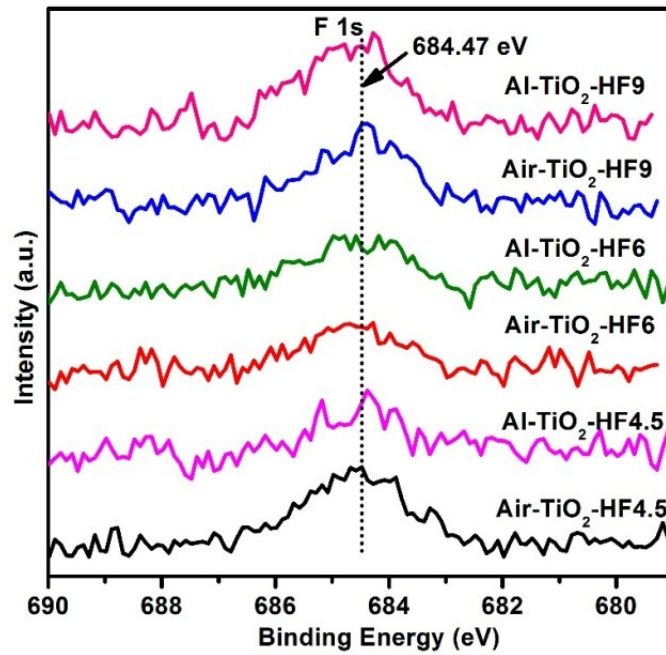

Fig. S4 (A) F 1s XPS spectra of pristine TiO<sub>2</sub> and Al reduced TiO<sub>2</sub>

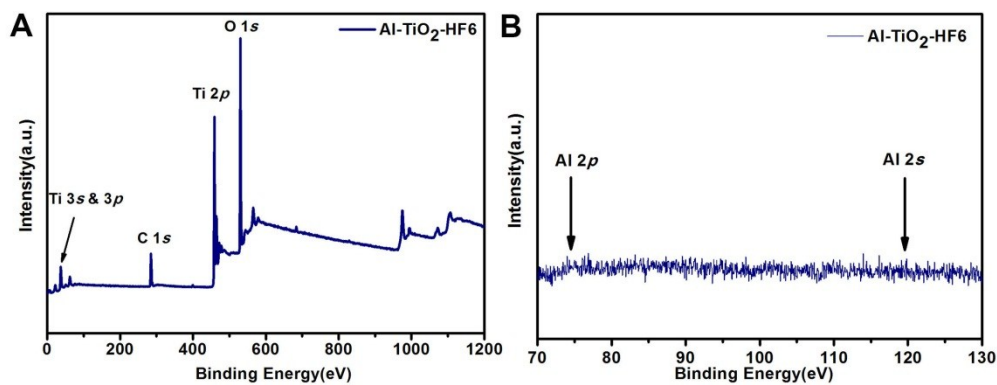

Fig. S5 XPS survey spectra and Al element analysis of of Al-TiO<sub>2</sub>-HF6 sample.

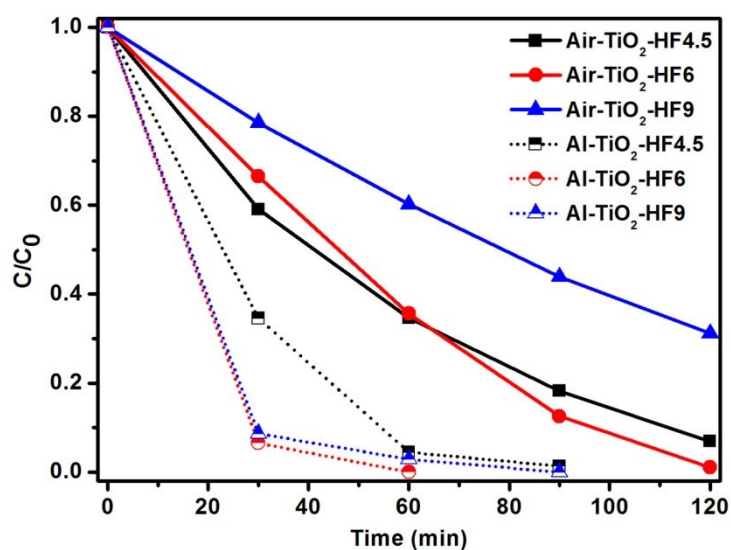

Fig. S6 UV-vis light induced photocatalytic degradation of methylene orange of as prepared TiO<sub>2</sub> nanosheets treated before and after Al reduction.

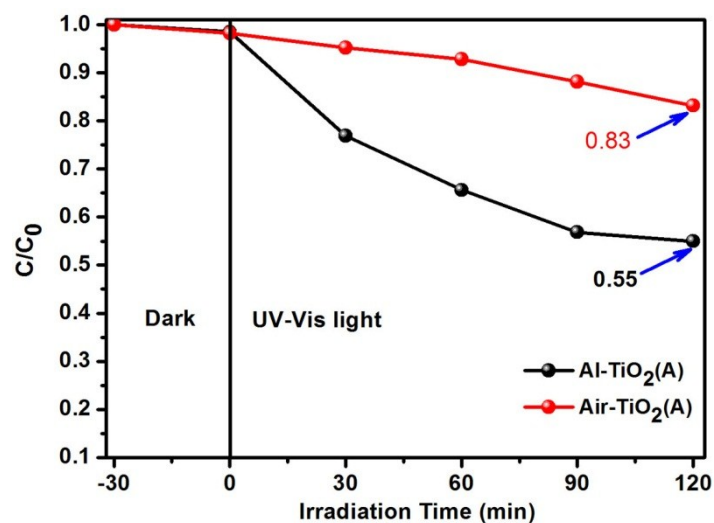

Fig. S7 UV-vis light induced photocatalytic degradation of methylene orange of Al-TiO<sub>2</sub>(A) and Air-TiO<sub>2</sub>(A) samples.

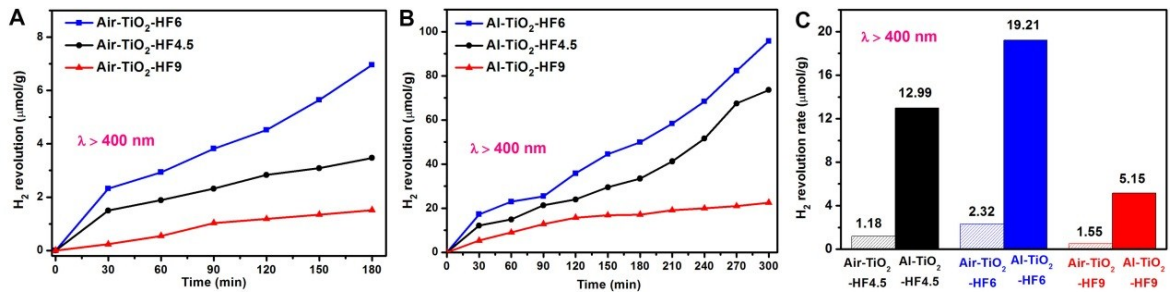

Fig. S8 Photocatalytic H<sub>2</sub> evolution over TiO<sub>2</sub> treated (A) before and (B) after Al reduction and their comparative study of H<sub>2</sub> evolution rates (C) under visible light irradiation ( $\lambda > 400$  nm)

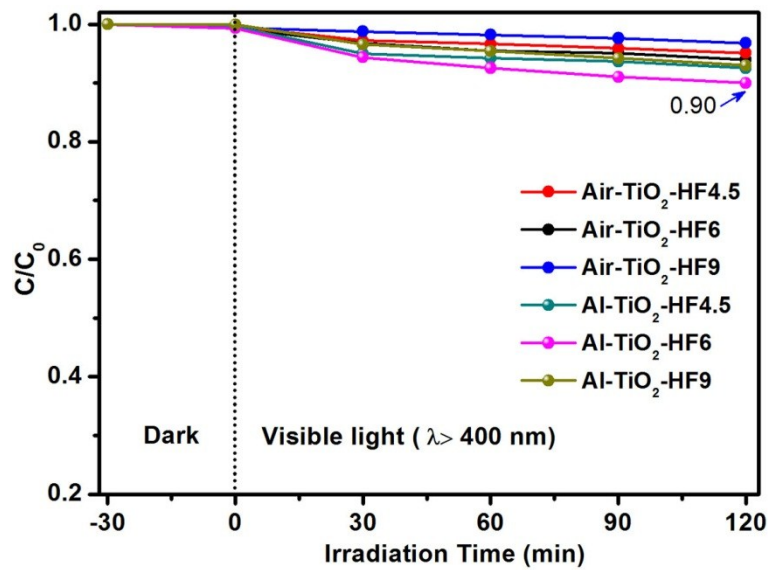

Fig. S9 Visible light ( $\lambda > 400$  nm) induced photocatalytic degradation of methylene orange of as prepared TiO<sub>2</sub> nanosheets treated before and after Al reduction.

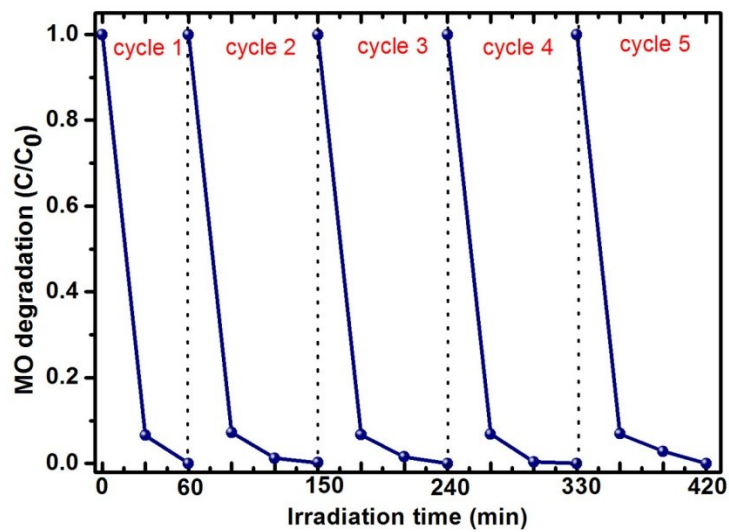

Fig.S10 Stability tests of UV-vis light irradiation induced photocatalytic activities (MO decomposition) of the as prepared Al-TiO<sub>2</sub>-HF6 nanosheets.

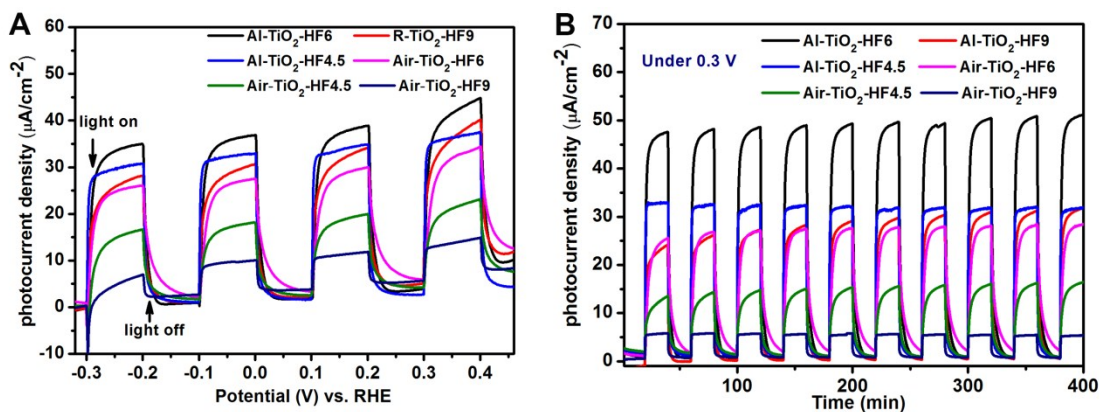

Fig. S11 Photoelectrochemical properties of pristine TiO<sub>2</sub> and Al-reduced TiO<sub>2</sub> electrodes: (A) chopped  $J-V$  curves and (B)  $I-t$  amperometric curves under UV-Vis light illumination using a three electrode setup (TiO<sub>2</sub> working, Pt counter, saturated calomel reference electrode) in a 1 M NaOH electrolyte.

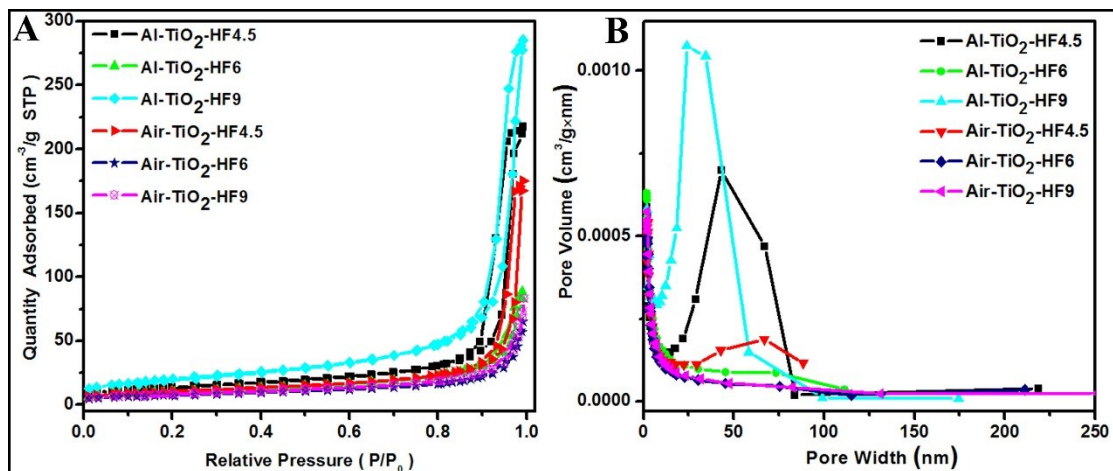

Fig. S12 N<sub>2</sub> adsorption-desorption isotherm (A) and pore size distribution (B) of prepared TiO<sub>2</sub> nanosheets samples before and after Al reduction.



Table S1. Structural information of as-synthesized Al reduced TiO<sub>2</sub> nanosheets synthesized at different reaction conditions.

| sample                     | Average Thickness<br>(nm) | Average Length<br>(nm) | Percentage of {001}<br>Facet |
|----------------------------|---------------------------|------------------------|------------------------------|
| Al-TiO <sub>2</sub> -HF4.5 | 7.2                       | 40-50                  | 58                           |
| Al-TiO <sub>2</sub> -HF6   | 5.9                       | 120-150                | 72                           |
| Al-TiO <sub>2</sub> -HF9   | 5.1                       | 50-60                  | 83                           |

Table S2. Structure information of BET specific surface areas, average pore width and total pore volume for as prepared TiO<sub>2</sub> samples before and after Al reduction

| Sample                      | BET specific surface<br>areas (m <sup>2</sup> /g) | Average pore width<br>(nm) | Total pore volume<br>(cm <sup>3</sup> /g) |
|-----------------------------|---------------------------------------------------|----------------------------|-------------------------------------------|
| Air-TiO <sub>2</sub> -HF4.5 | 37.48                                             | 8.95                       | 0.083895                                  |
| Al-TiO <sub>2</sub> -HF4.5  | 49.86                                             | 22.42                      | 0.279436                                  |
| Air-TiO <sub>2</sub> -HF6   | 73.86                                             | 15.12                      | 0.279157                                  |
| Al-TiO <sub>2</sub> -HF6    | 26.45                                             | 8.42                       | 0.05783                                   |
| Air-TiO <sub>2</sub> -HF9   | 29.39                                             | 8.62                       | 0.066025                                  |
| Al-TiO <sub>2</sub> -HF9    | 39.61                                             | 10.89                      | 0.103493                                  |
